# Supplementary material
Source: PubMed Central journal article supplement (PMC7483781)
Supplement: NIHMS1607480-supplement-3.pdf [file NIHMS1607480-supplement-3.pdf]

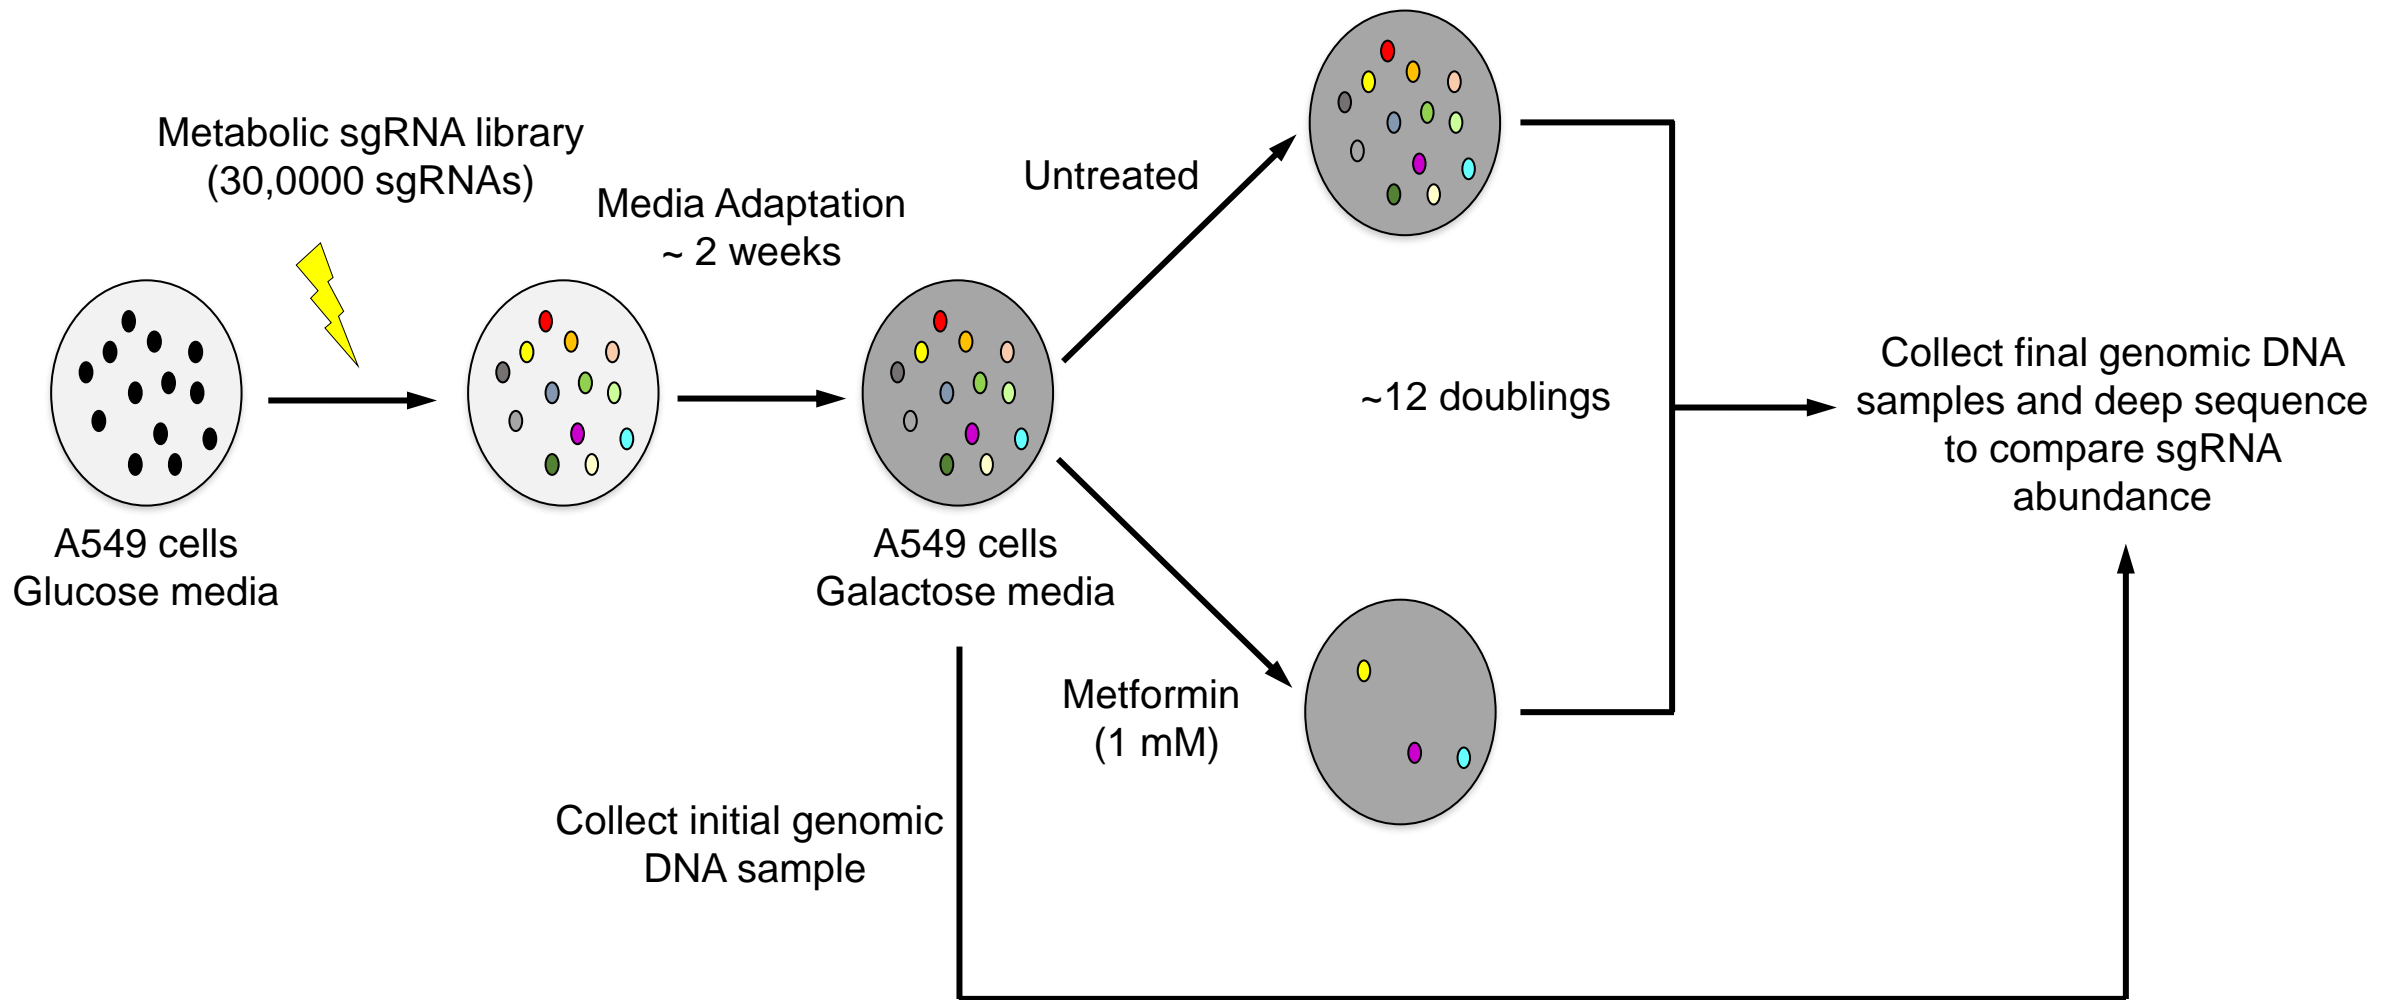

**Supplemental Figure 1: Metformin positive selection CRISPR-based screen.** To identify metabolic genes required for metformin-induced cell death, we conducted a CRISPR-Cas9-based positive-selection screen. Construction, lentivirus production, and A549 cell transduction of the metabolism-focused sgRNA library was performed as previously described<sup>18</sup>. Following puromycin selection, library transduced cells were adapted to galactose media for two weeks. Cells were then treated with 1mM metformin. Once the screen was complete (~12 population doublings), the cells were harvested for genomic DNA extraction.
