# Supplementary material
Source: PubMed Central journal article supplement (PMC7483781)
Supplement: NIHMS1607480-supplement-4.pdf [file NIHMS1607480-supplement-4.pdf]

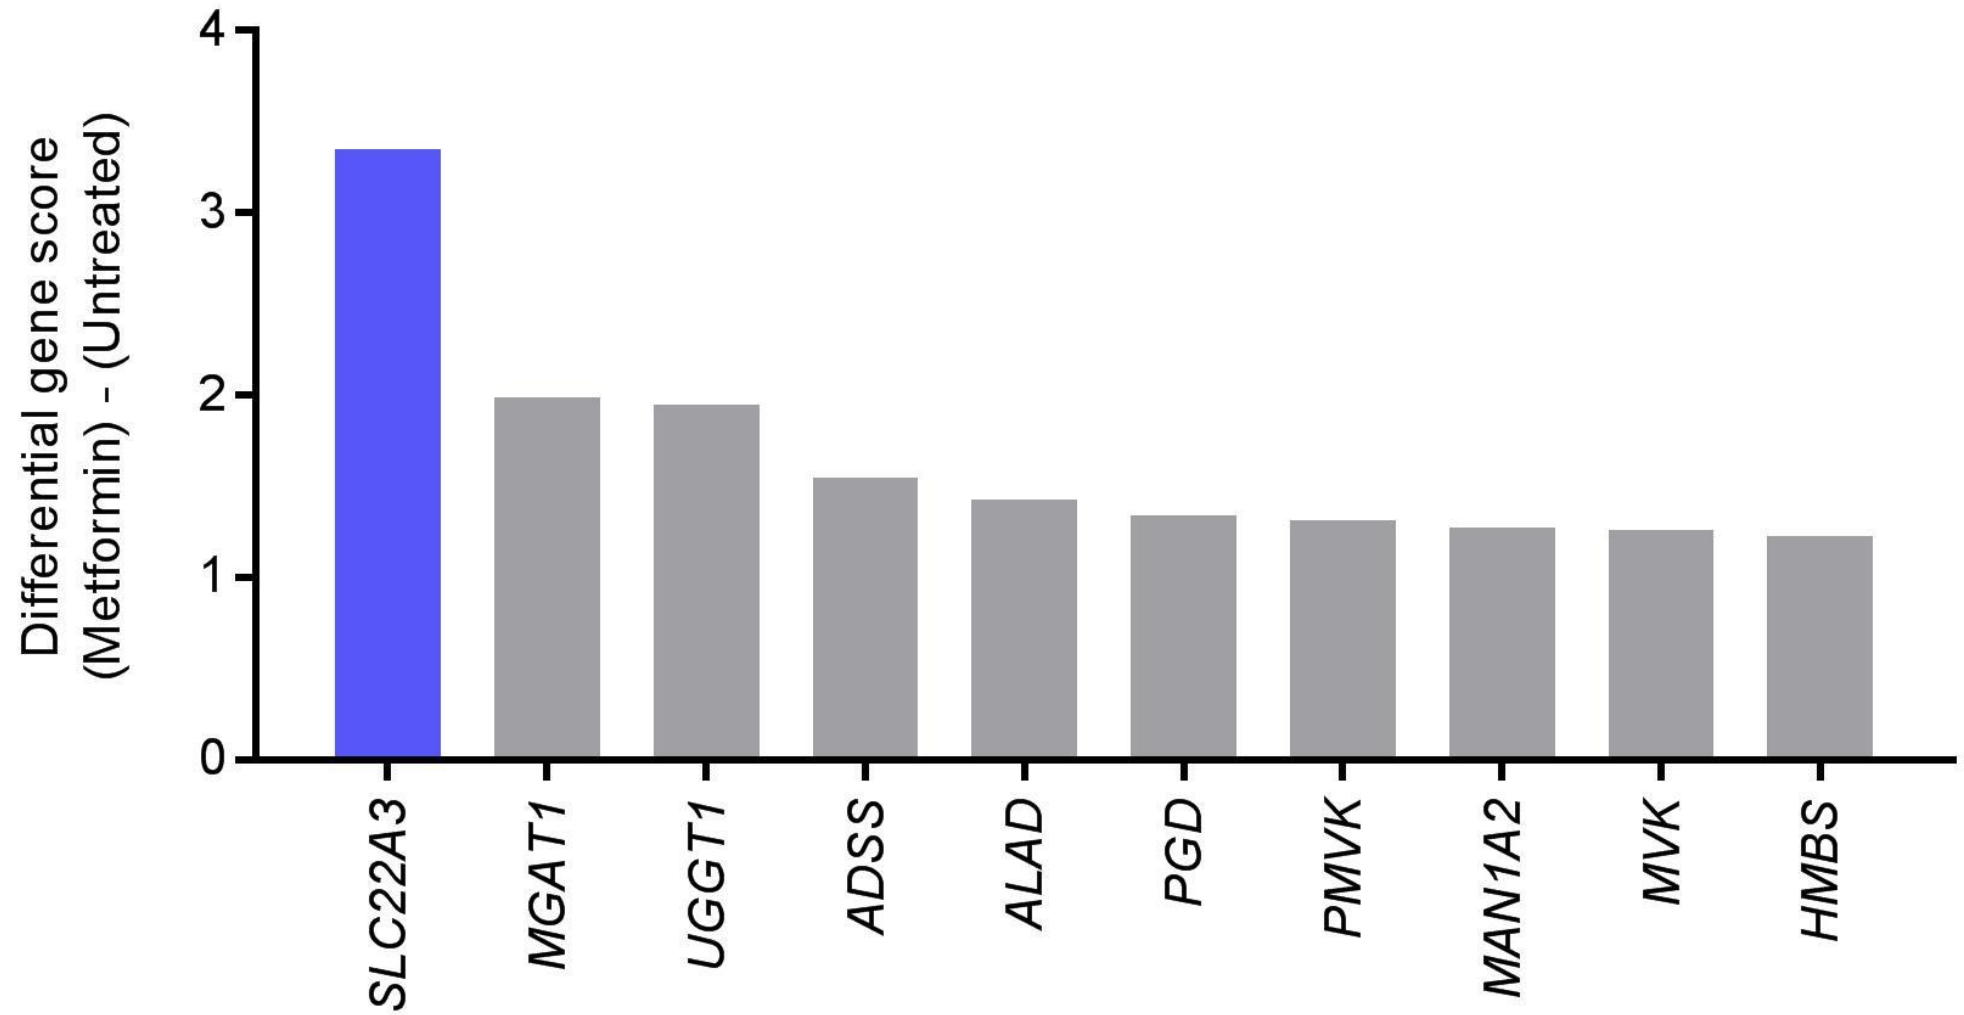

**Supplemental Figure 2: SLC22A3 (OCT3) loss confers resistance to metformin in A549 lung cancer cells.** The gene scores for the top 10 genes following treatment with 1mM metformin. Organic cation transporter 3 (OCT3 or SLC22A3) is the top scoring gene. Gene score is defined as the mean  $\log_2$  fold change in the abundance of all sgRNAs targeting a particular gene between the final and initial cell populations. The difference between the untreated and metformin-treated gene scores is the differential gene score.
